# Supplementary material for: Global sinusoidal seasonality in precipitation isotopes
Source: Copernicus journal article supplement (doi:10.5194/hess-23-3423-2019), 2019-08-21
Supplement: Supplementary file 2 [file hess-23-3423-2019-supplement.zip]

## ***Supplement to Global sinusoidal seasonality in precipitation isotopes (in HESS)***

S. T. Allen, S. Jasechko, W. R. Berghuijs, J. M. Welker, G. R. Goldsmith, J. W. Kirchner

### *Supporting information 3*

Accessible on Zenodo.org (dataset: 10.5281/zenodo.3350832)

Data S2 containing, geoTIFF grids (5-minute resolution, 60°S to 90°N; empty cells = -9999) of the following:

Precipitation  $\delta^{18}\text{O}$  amplitude (‰)

Precipitation  $\delta^{18}\text{O}$  phase (day of peak value, in days from summer solstice)

Precipitation  $\delta^{18}\text{O}$  offset (‰)

Precipitation  $\delta^2\text{H}$  amplitude (‰)

Precipitation  $\delta^2\text{H}$  phase (day of peak value, in days from summer solstice)

Precipitation  $\delta^2\text{H}$  offset (‰)

Precipitation amount amplitude ( $\text{mm month}^{-1}$ )

Precipitation amount phase (day of peak value, in days from summer solstice)

Precipitation amount offset ( $\text{mm month}^{-1}$ )
