# Supplementary material for: Global sinusoidal seasonality in precipitation isotopes
Source: Copernicus journal article supplement (doi:10.5194/hess-23-3423-2019), 2019-08-21
Supplement: Supplementary file 3 [file hess-23-3423-2019-supplement.zip]

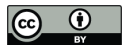

## *Supplement of*

# **Global sinusoidal seasonality in precipitation isotopes**

**Scott T. Allen et al.**

*Correspondence to:* Scott T. Allen ([scott.t.allen@utah.edu](mailto:scott.t.allen@utah.edu))

- [hess-23-3423-2019-supplement-title-page.pdf](#)
- [Supplement 1 to Global Sinusoidal Seasonality.pdf](#)
- [Supplement 2 to Global Sinusoidal Seasonality.csv](#)
- [Supplement 3 to Global Sinusoidal Seasonality.pdf](#)

The copyright of individual parts of the supplement might differ from the CC BY 4.0 License.
